# Supplementary material for: Ionic liquid immobilized on modified magnetic FSM-16: an efficient and magnetically recoverable nanocatalyst
Source: Royal Society of Chemistry journal article supplement (doi:10.1039/d3ra04953a), 2023-01-01
Supplement: d3ra04953a1.pdf [file d3ra04953a1.pdf]

## Supporting Information

### Ionic liquid immobilized on modified magnetic FSM-16: An efficient and magnetically recoverable nanocatalyst

Azar Jahanbakhshi and Mahnaz Farahi\*

Department of Chemistry, Yasouj University, P. O. Box 353, Yasouj 75918-74831, Iran

\*Corresponding author: E-mail: [farahimb@yu.ac.ir](mailto:farahimb@yu.ac.ir)

| Spectral Data FT-IR |                                                                                                                                                                             |
|---------------------|-----------------------------------------------------------------------------------------------------------------------------------------------------------------------------|
| <b>5a</b>           | 3288 (N-H, stretching), 3027 (C-H, Ar), 2962 (C-H stretching), 1692 (C=O, ester), 1606(C=O, ketone), 1492(C=C, Ar), 1249 (C-N), 1160 (C-O, ester), 979 cm <sup>-1</sup> .   |
| <b>5b</b>           | 3274 (N-H, stretching), 3066 (C-H, Ar), 2962 (C-H stretching), 1704 (C=O, ester), 1604 (C=O, ketone), 1496 (C=C, Ar), 1249(C-N), 1172(C-O, ester), 883 cm <sup>-1</sup> .   |
| <b>5c</b>           | 3274 (N-H, stretching), 3070 (C-H, Ar), 2958 (C-H stretching), 1708 (C=O, ester), 1639 (C=O, ketone), 1492 (C=C, Ar), 1218 (C-N), 1092(C-O, ester), 833 cm <sup>-1</sup> .  |
| <b>5d</b>           | 3282 (N-H, stretching), 3073(C-H, Ar), 2958 (C-H stretching), 1681(C=O, ester), 1604(C=O, ketone), 1488 (C=C, Ar), 1145 (C-N), 1072 (C-O, ester), 883 cm <sup>-1</sup> .    |
| <b>5e</b>           | 3291(N-H, stretching), 3074(C-H, Ar), 2968(C-H stretching), 1707(C=O, ester), 1659(C=O, ketone), 1486(C=C, Ar), 1213(C-N), 1041 (C-O, ester), 797 cm <sup>-1</sup> .        |
| <b>5f</b>           | 3289 (N-H, stretching), 3068(C-H, Ar), 2962(C-H stretching), 1702(C=O, ester), 1650(C=O, ketone), 1494(C=C, Ar), 1220(C-N), 1089 (C-O, ester), 763 cm <sup>-1</sup> .       |
| <b>5g</b>           | 3237 (N-H, stretching), 3053(C-H, Ar), 2936(C-H stretching), 1702(C=O, ester), 1643(C=O, ketone), 1489(C=C, Ar), 1221(C-N), 1089 (C-O, ester), 783 cm <sup>-1</sup> .       |
| <b>5h</b>           | 3226 (N-H, stretching), 3077(C-H, Ar), 2976(C-H stretching), 1700(C=O, ester), 1648(C=O, ketone), 1494(C=C, Ar), 1230(C-N), 1075 (C-O, ester) cm <sup>-1</sup> .            |
| <b>5i</b>           | 3440 (N-H, stretching), 3087(C-H, Ar), 2958(C-H stretching), 1717(C=O, ester), 1634(C=O, ketone), 1498(C=C, Ar), 1243(C-N), 1222(C-O), 1065 (C-O, ester) cm <sup>-1</sup> . |

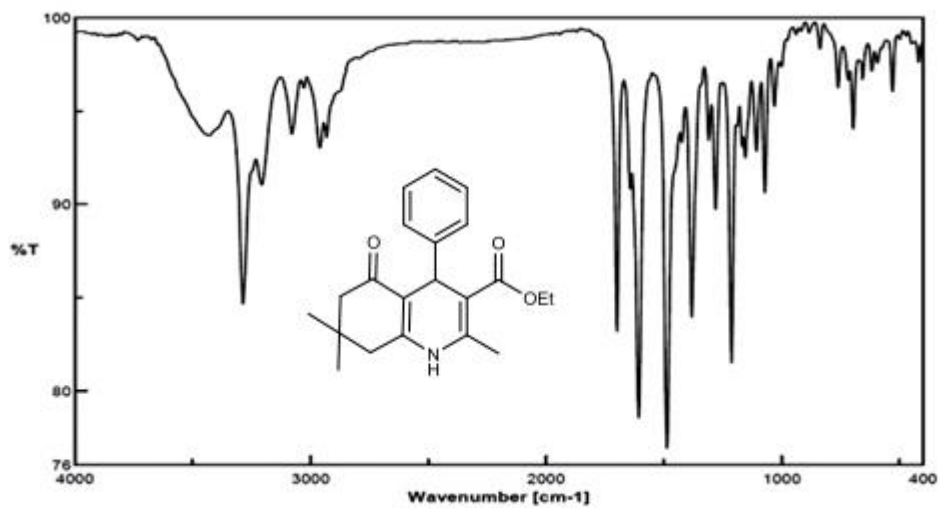

FT-IR spectrum of Ethyl-2,7,7-trimethyl-5-oxo-4-phenyl-1,4,5,6,7,8-hexahydroquinoline-3-carboxylate (5a).

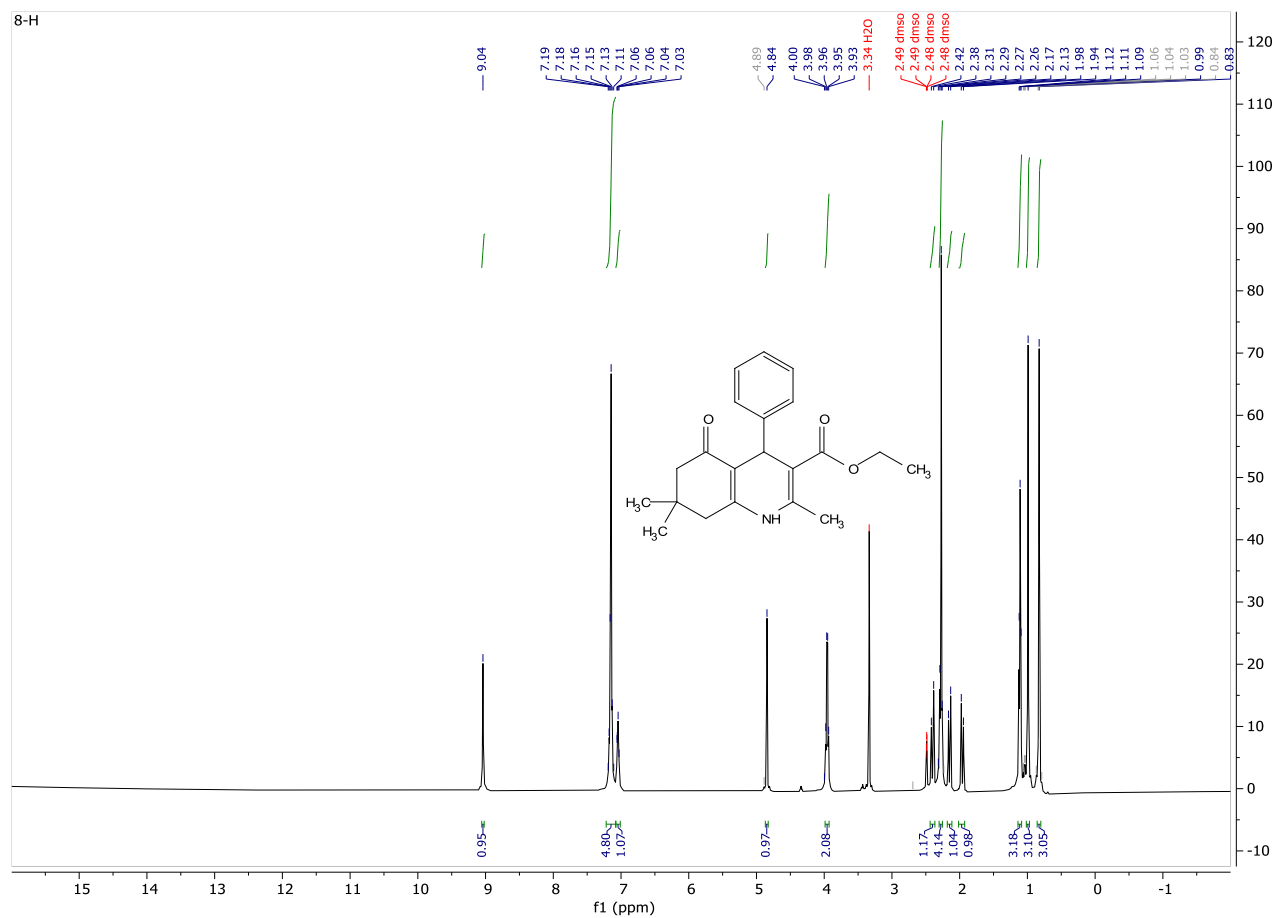

<sup>1</sup>H NMR spectrum of Ethyl-2,7,7-trimethyl-5-oxo-4-phenyl-1,4,5,6,7,8-hexahydroquinoline-3-carboxylate (**5a**)

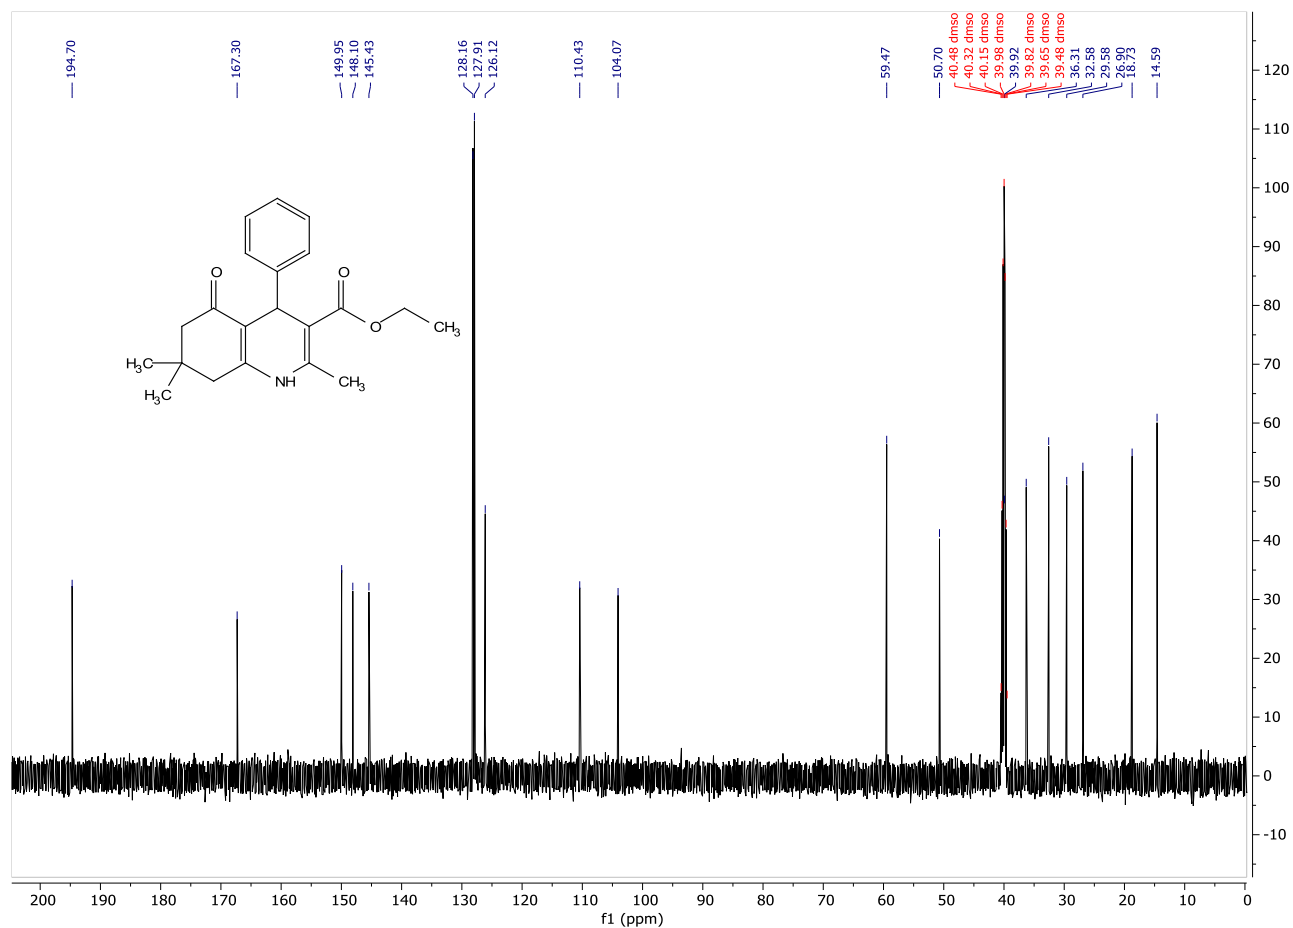

<sup>13</sup>C NMR spectrum of Ethyl-2,7,7-trimethyl-5-oxo-4-phenyl-1,4,5,6,7,8-hexahydroquinoline-3-carboxylate (5a)

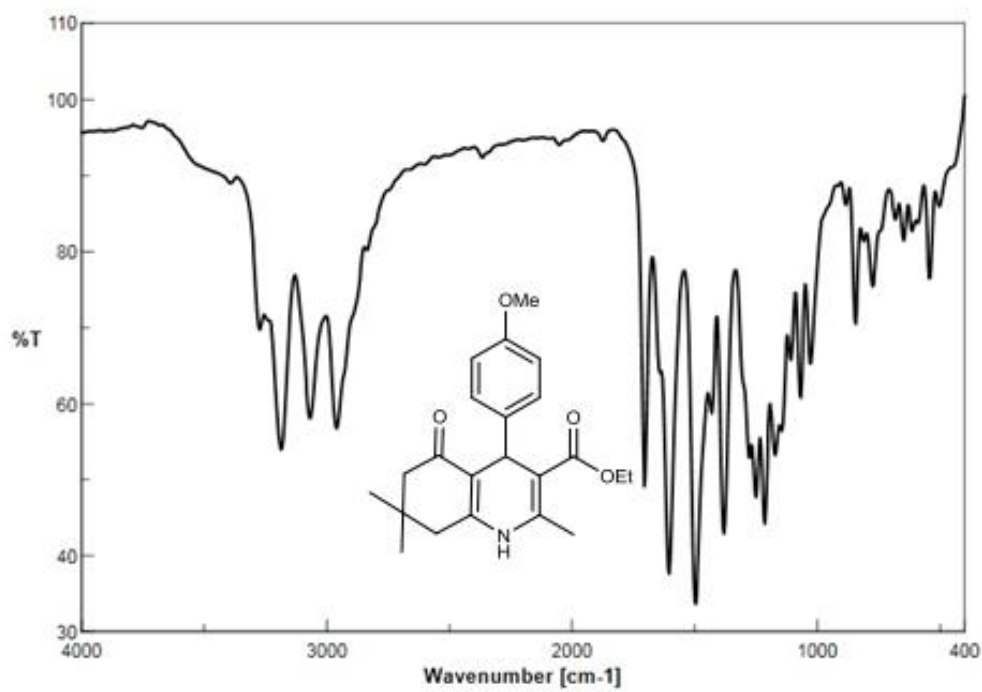

FT-IR spectrum of Ethyl-4-(4-methoxyphenyl)-2,7,7-trimethyl-5-oxo-1,4,5,6,7,8-hexahydro quinoline-3-carboxylate (**5b**).

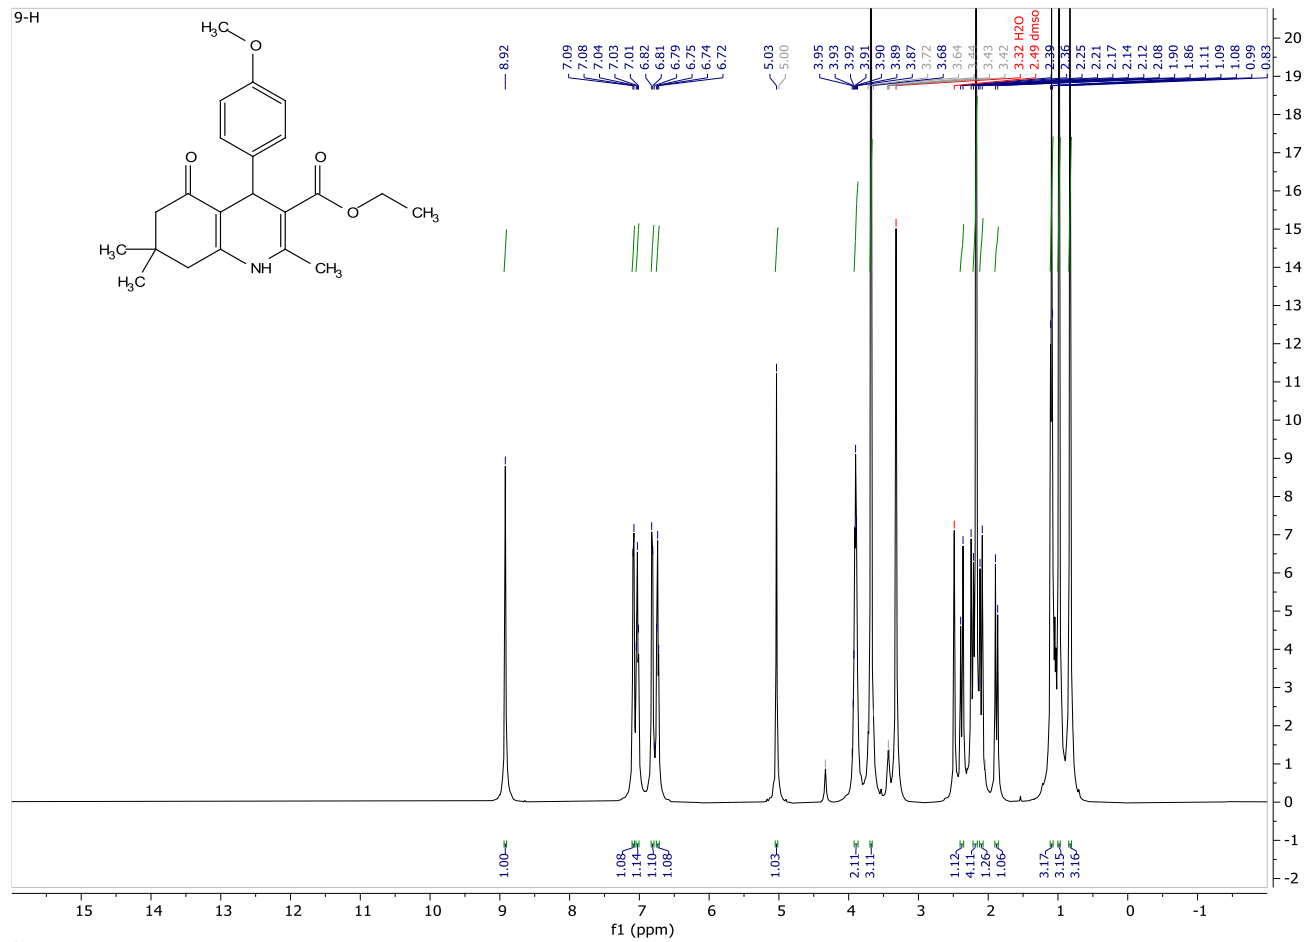

<sup>1</sup>H NMR spectrum of Ethyl 4-(4-methoxyphenyl)-2,7,7-trimethyl-5-oxo-1,4,5,6,7,8-hexahydroquinoline-3-carboxylate (**5b**).

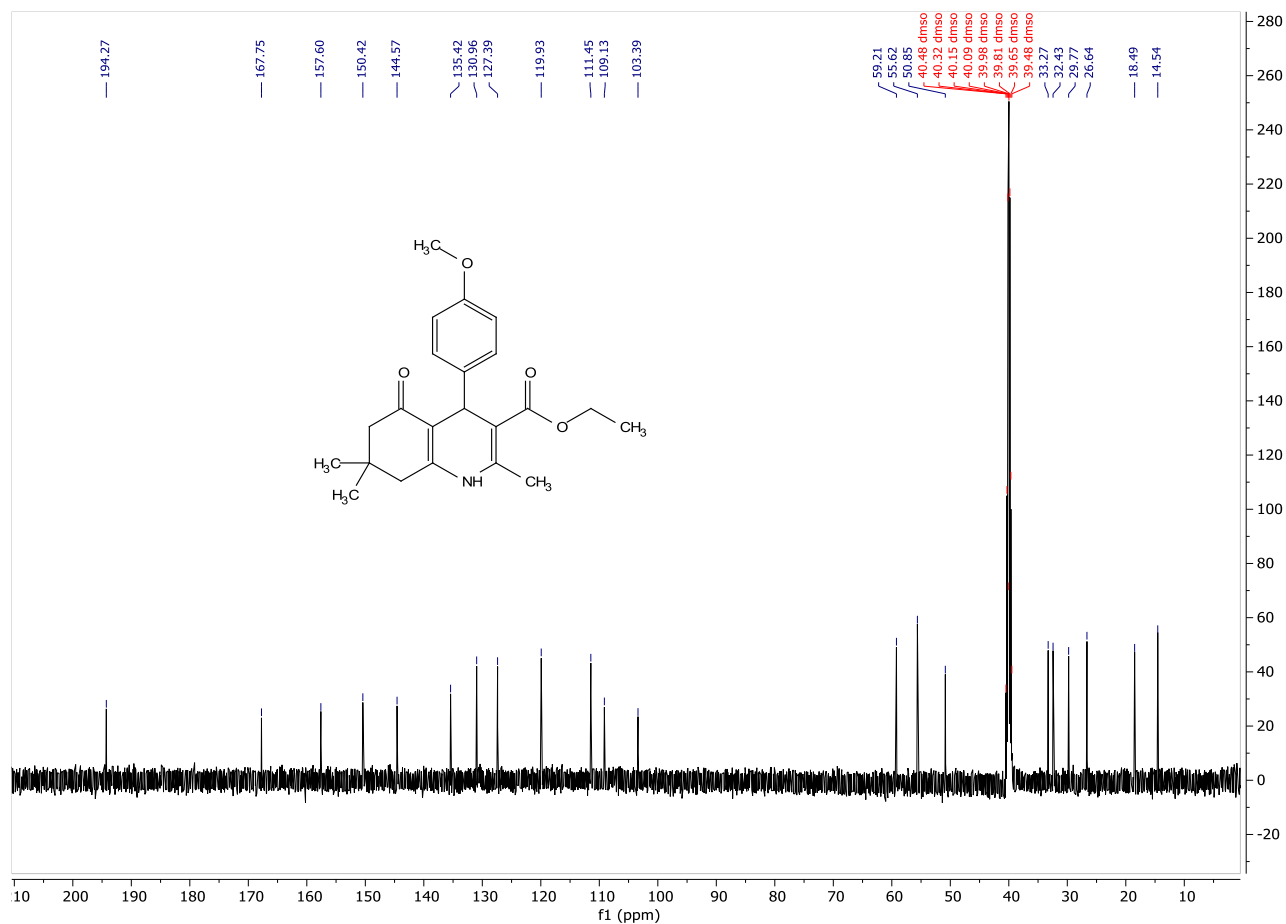

<sup>13</sup>C NMR spectrum of Ethyl-4-(4-methoxyphenyl)-2,7,7-trimethyl-5-oxo-1,4,5,6,7,8-hexahydroquinoline-3-carboxylate (**5b**).

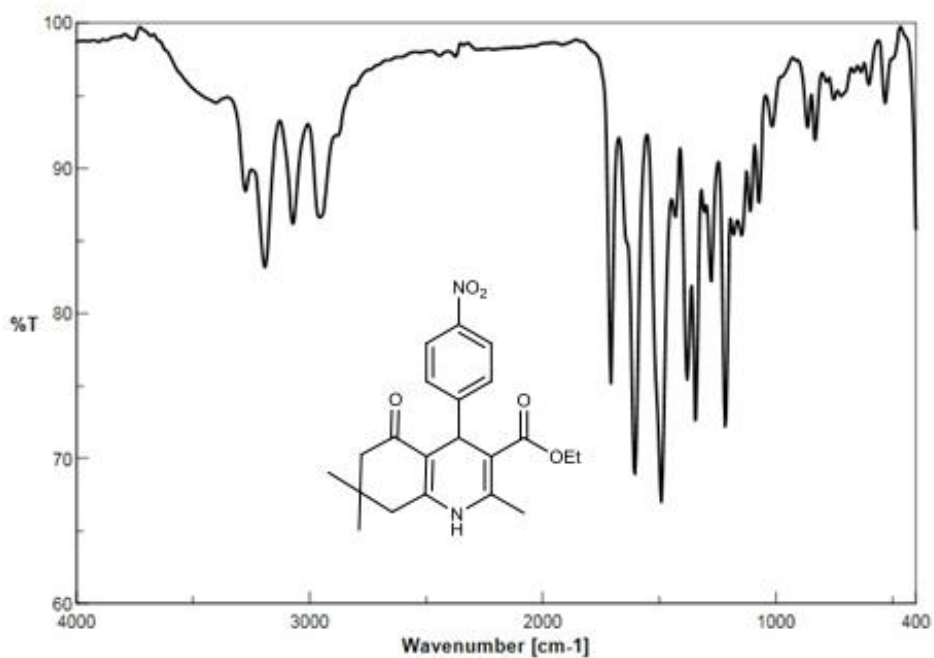

FT-IR spectrum of Ethyl 2,7,7-trimethyl-4-(4-nitrophenyl)-5-oxo-1,4,5,6,7,8-hexahydro quinoline-3-carboxylate (**5c**).

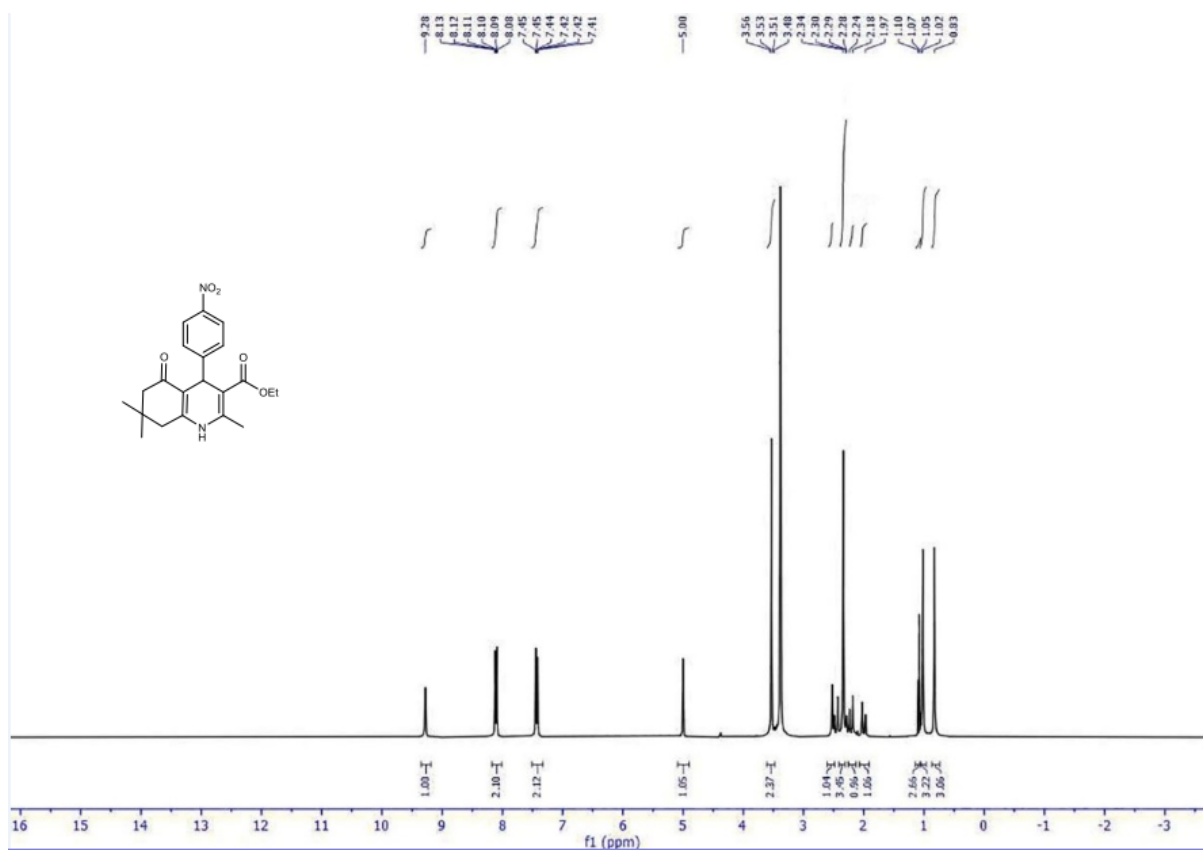



$^1\text{H}$  NMR spectrum of Ethyl2,7,7-trimethyl-4-(4-nitrophenyl)-5-oxo-1,4,5,6,7,8-hexahydro quinoline-3-carboxylate (**5c**).

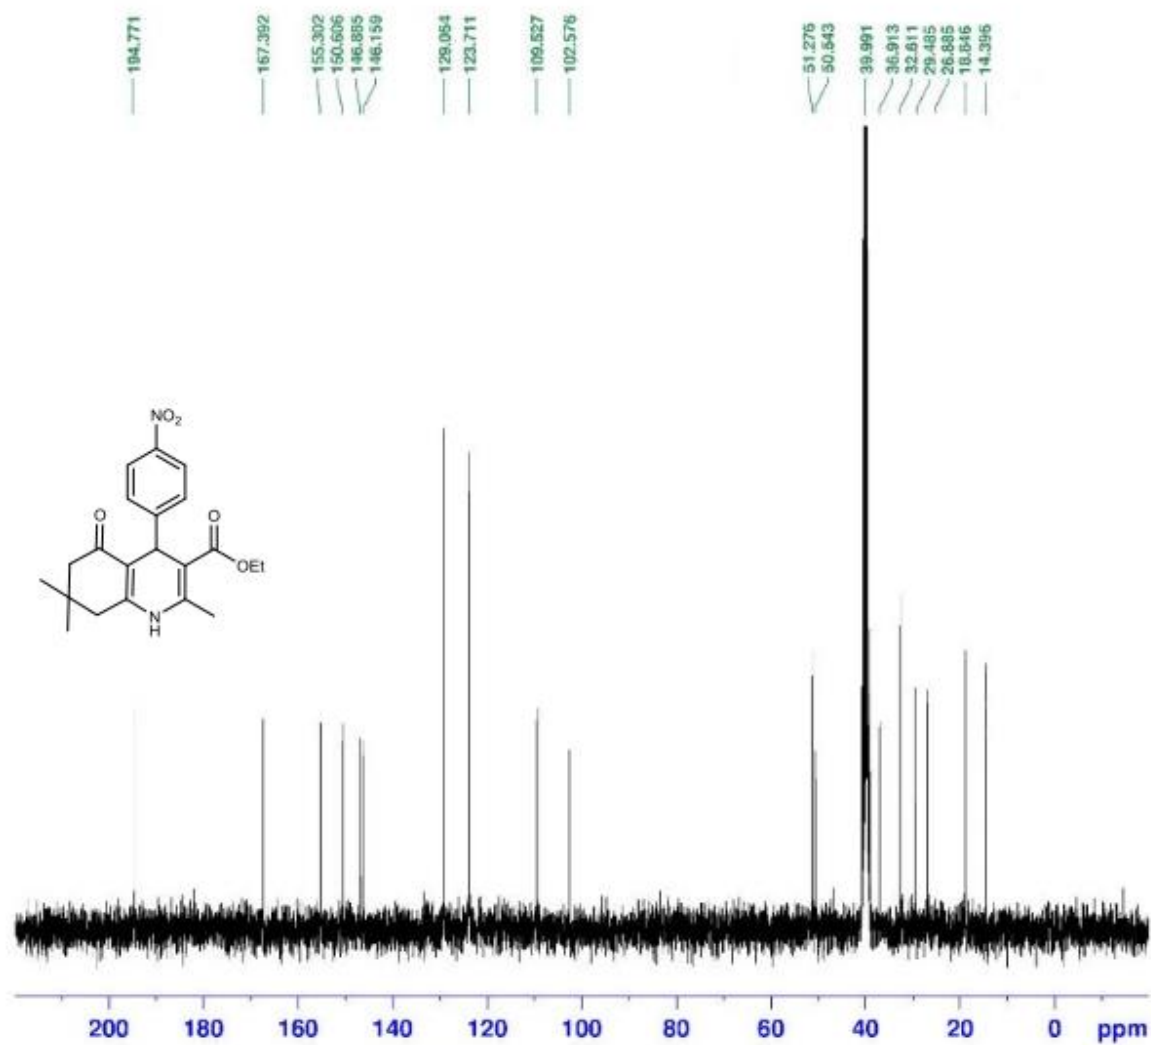

$^{13}\text{C}$  NMR spectrum of Ethyl2,7,7-trimethyl-4-(4-nitrophenyl)-5-oxo-1,4,5,6,7,8-hexahydro quinoline-3-carboxylate (**5c**).

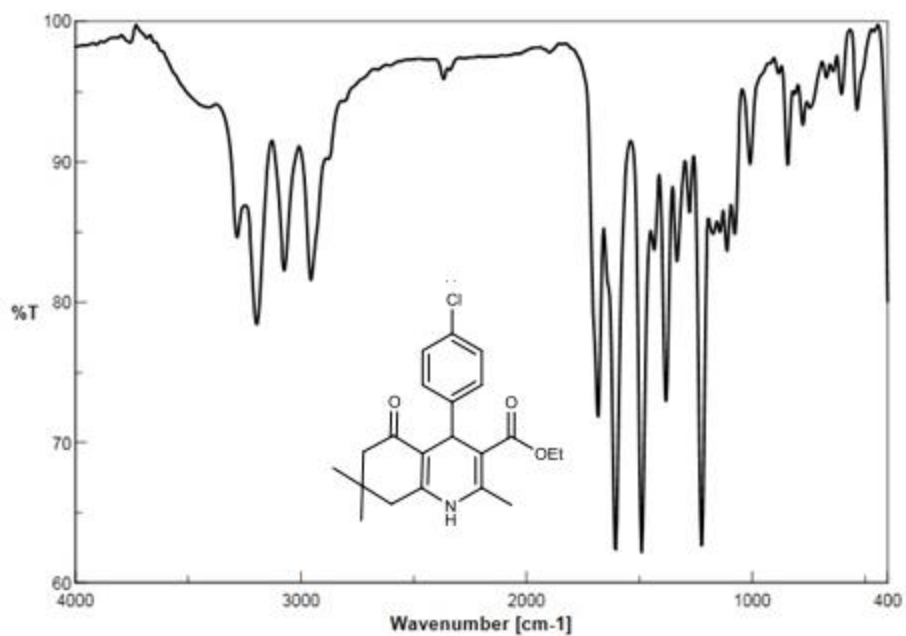

FT-IR spectrum of Eethyl-4-(4-chlorophenyl)-2,7,7-trimethyl-5-oxo-1,4,5,6,7,8-hexahydro quinoline-3-carboxylate (**5d**).

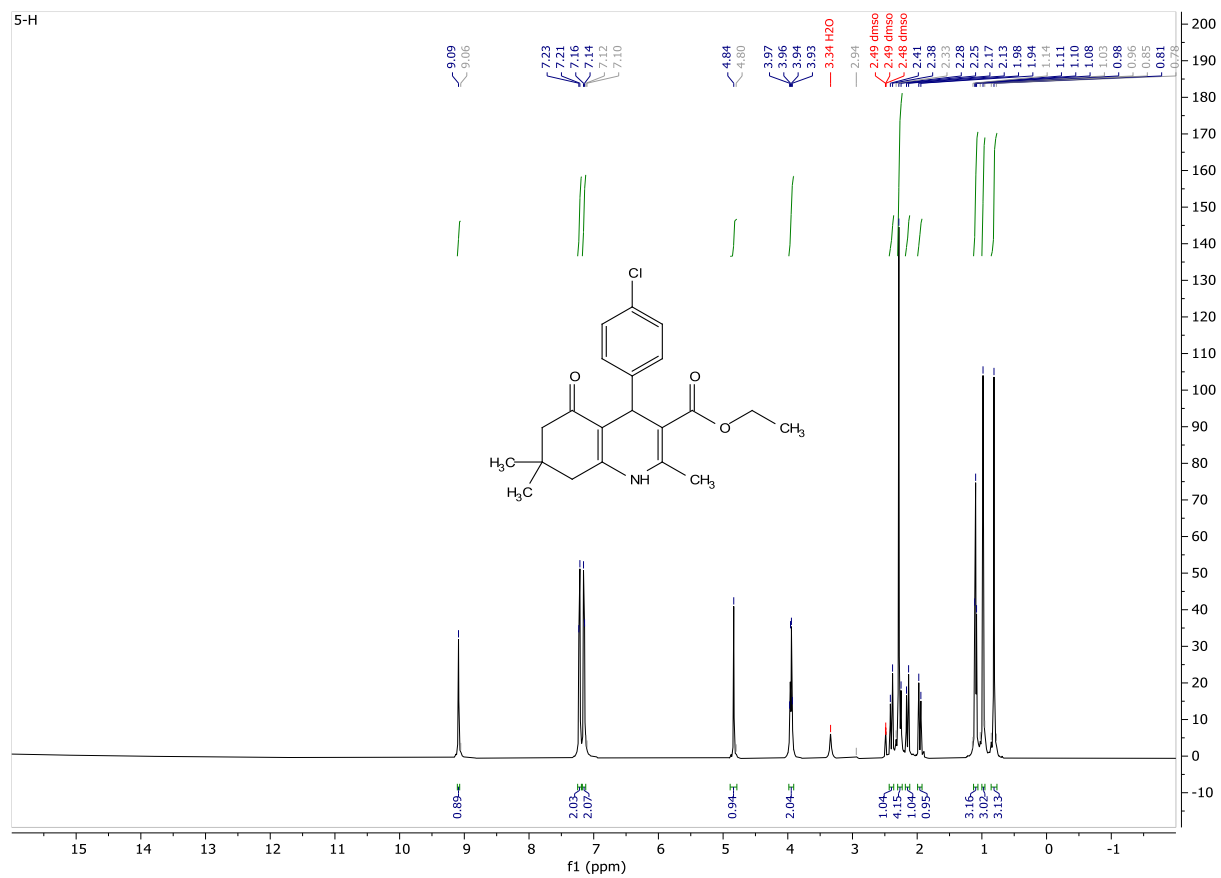

<sup>1</sup>H NMR spectrum of Eethyl-4-(4-chlorophenyl)-2,7,7-trimethyl-5-oxo-1,4,5,6,7,8-hexahydro quinoline-3-carboxylate (**5d**).

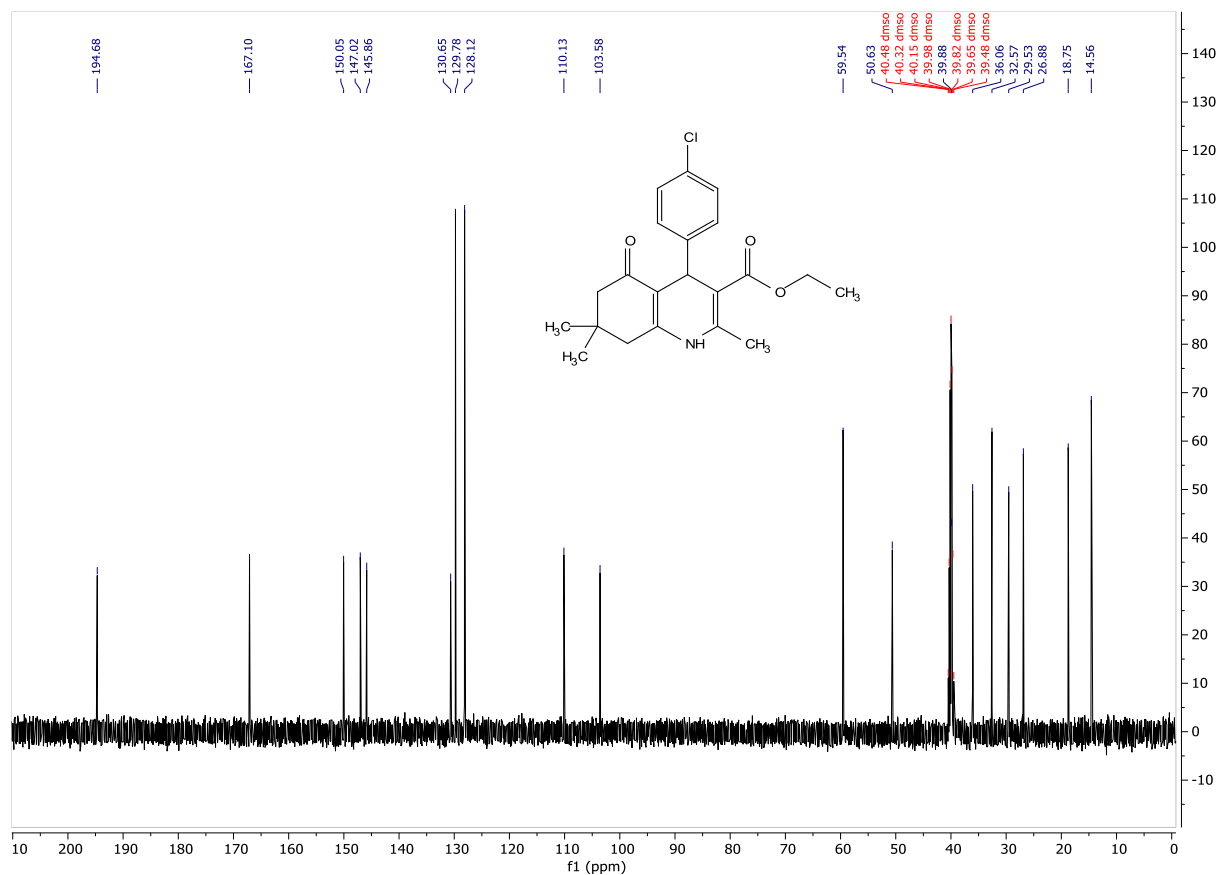

<sup>13</sup>C NMR spectrum of Eethyl-4-(4-chlorophenyl)-2,7,7-trimethyl-5-oxo-1,4,5,6,7,8-hexahydro quinoline-3-carboxylate (**5d**).

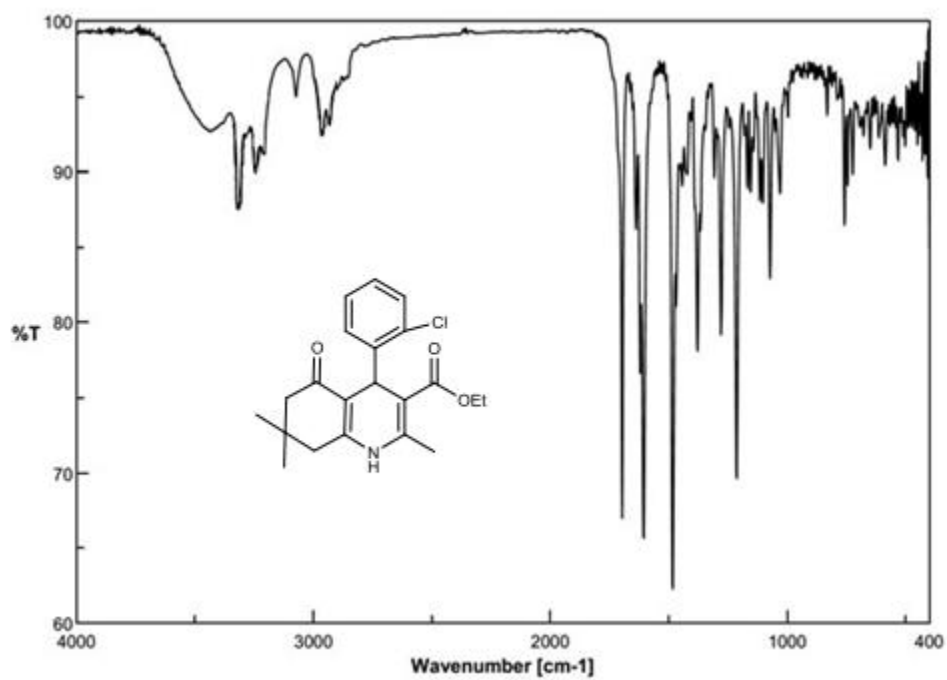

FT-IR spectrum of Eethyl-4-(2-chlorophenyl)-2,7,7-trimethyl-5-oxo-1,4,5,6,7,8-hexahydro quinoline-3-carboxylate (**5e**).

Tir.421.fid

Dr. Farahi- code C56(jahanbakhshi)-

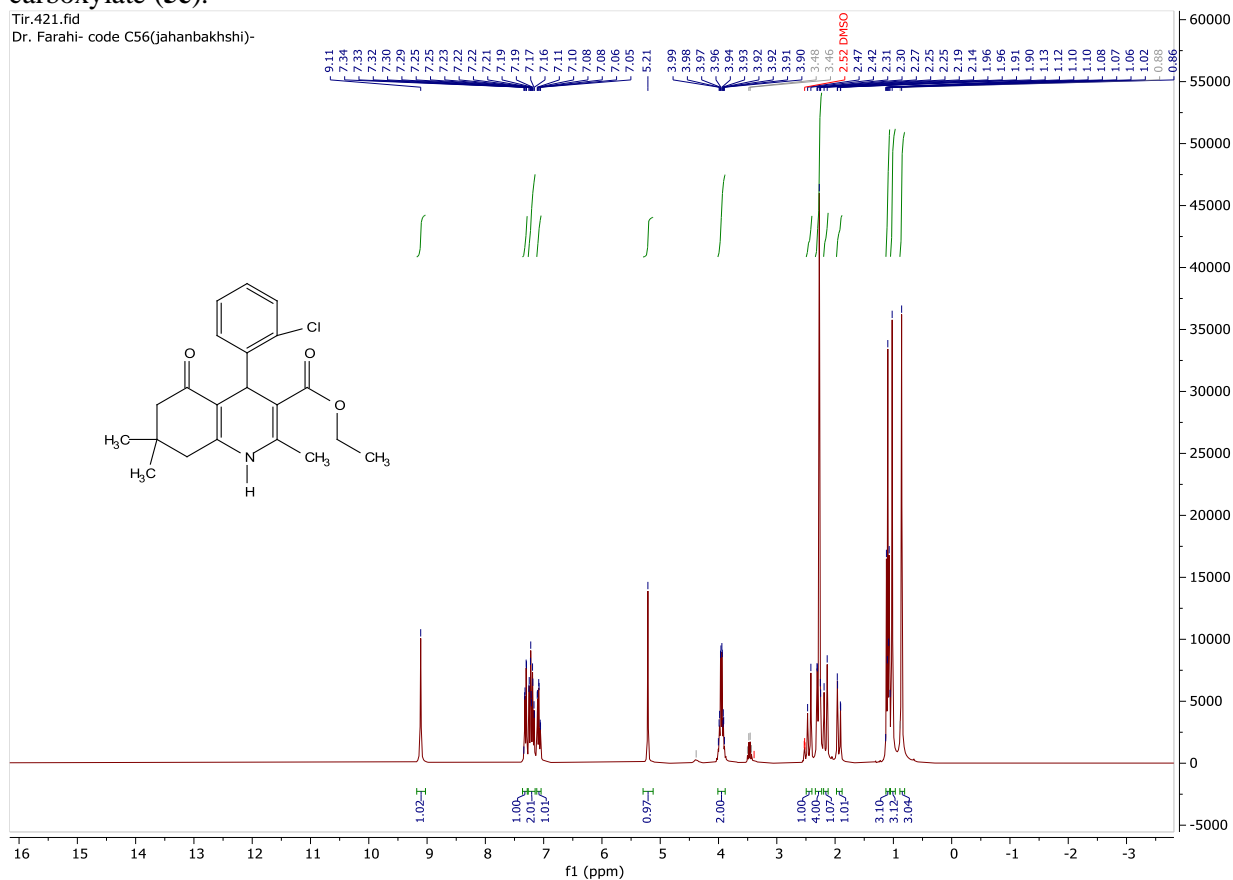

<sup>1</sup>H NMR spectrum of Eethyl-4-(2-chlorophenyl)-2,7,7-trimethyl-5-oxo-1,4,5,6,7,8-hexahydro quinoline-3-carboxylate (**5e**).

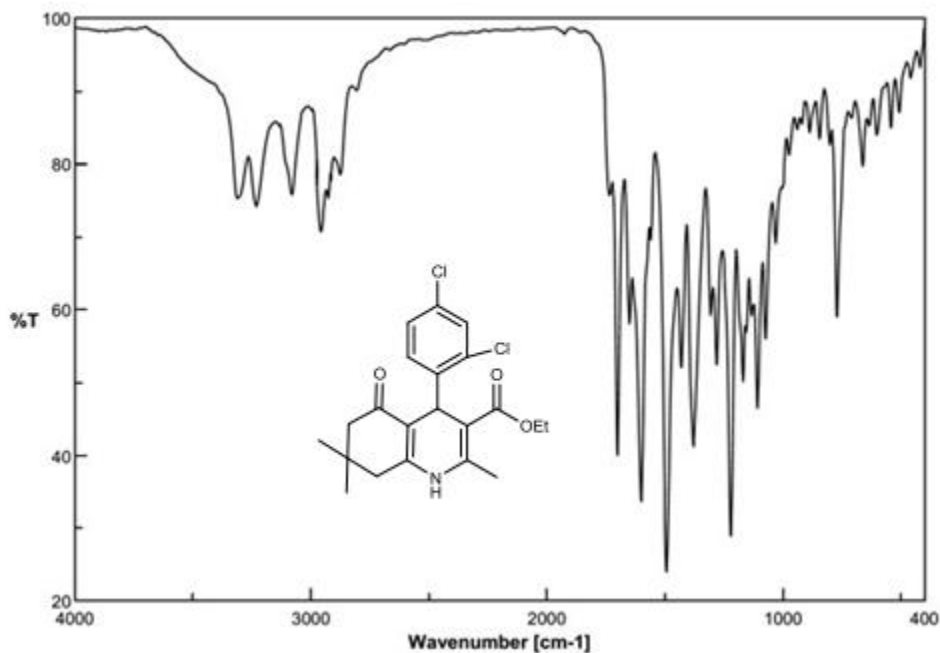

FT-IR spectrum of Ethyl-4-(2,4-dichlorophenyl)-2,7,7-trimethyl-5-oxo-1,4,5,6,7,8-hexahydro quinoline-3-carboxylate (**5f**).

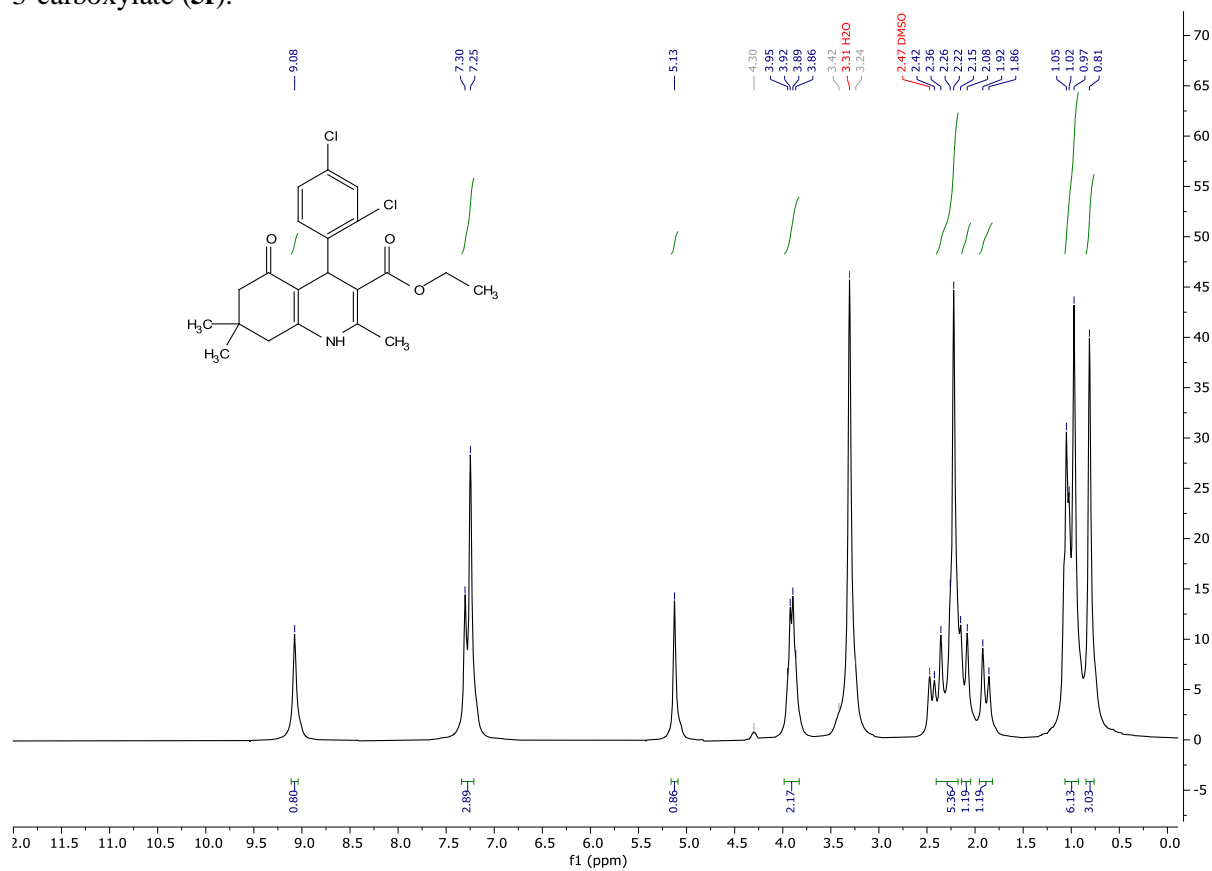

<sup>1</sup>H NMR spectrum of Ethyl-4-(2,4-dichlorophenyl)-2,7,7-trimethyl-5-oxo-1,4,5,6,7,8-hexahydro quinoline-3-carboxylate (**5f**).

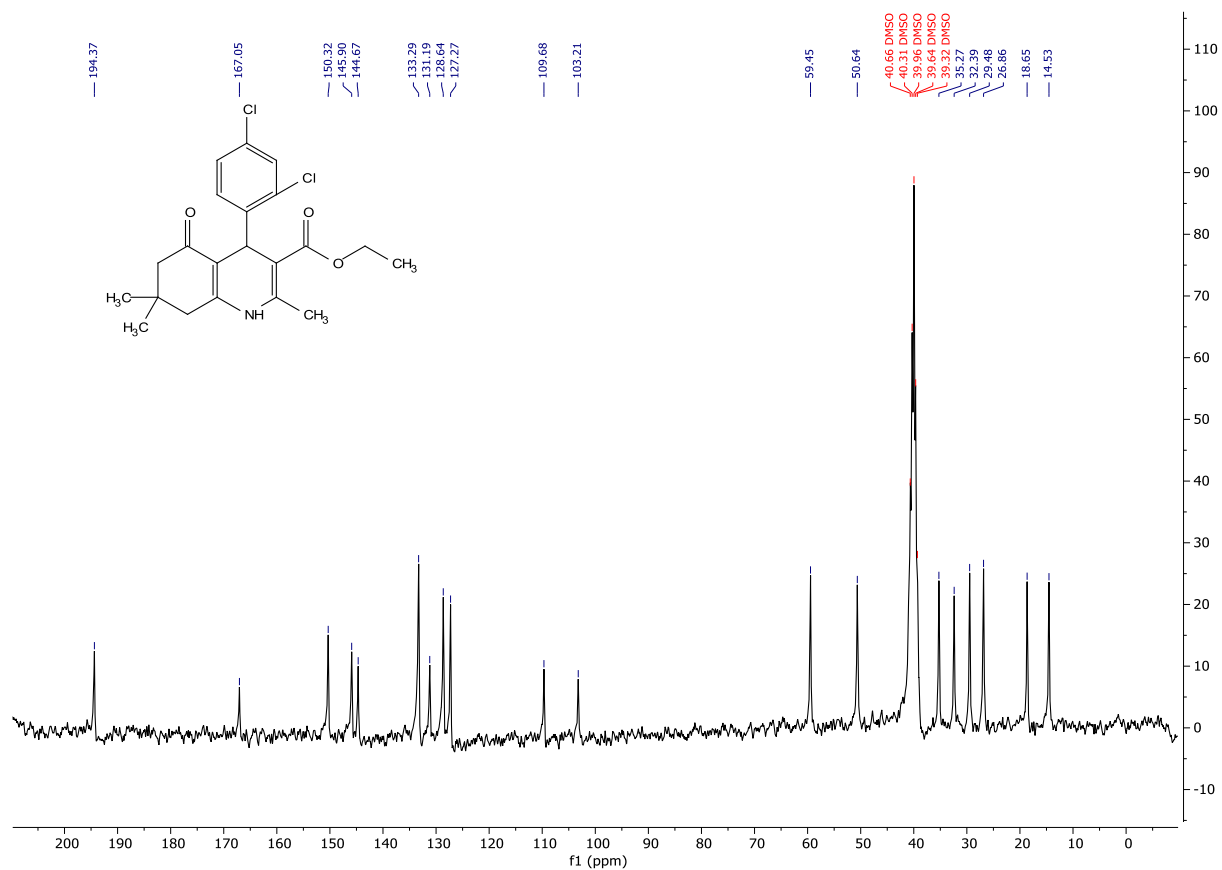

<sup>13</sup>C NMR spectrum of Ethyl-4-(2,4-dichlorophenyl)-2,7,7-trimethyl-5-oxo-1,4,5,6,7,8-hexahydroquinoline-3-carboxylate (**5f**).

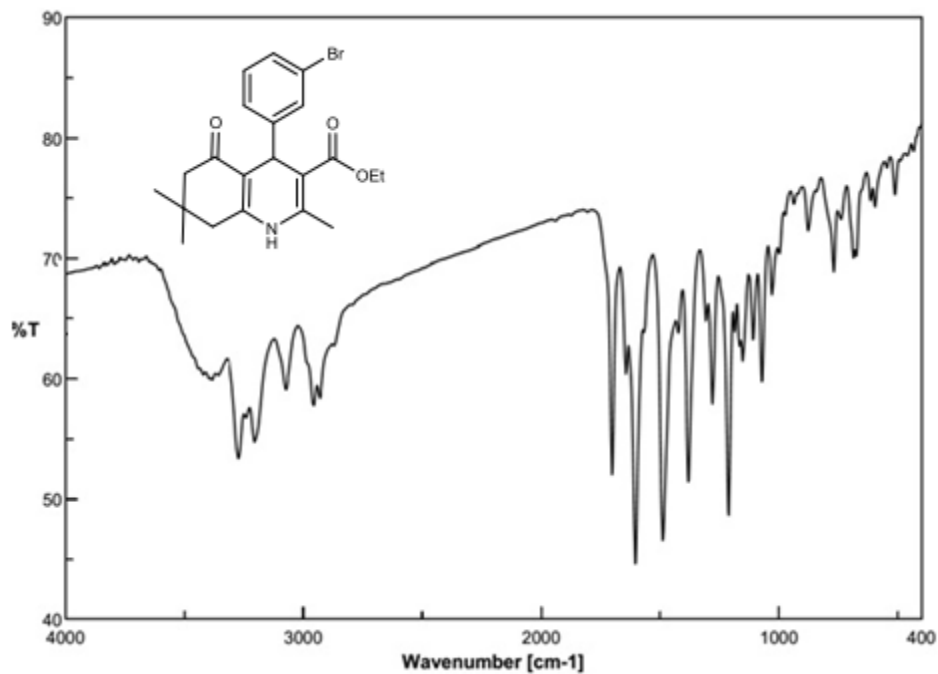

FT-IR spectrum of Ethyl-4-(3-bromophenyl)-2,7,7-trimethyl-5-oxo-1,4,5,6,7,8-hexahydro quinoline-3-carboxylate (**5g**).

Tir.420.fid

Dr. Farahi- code B35(jahanbakhshi)-

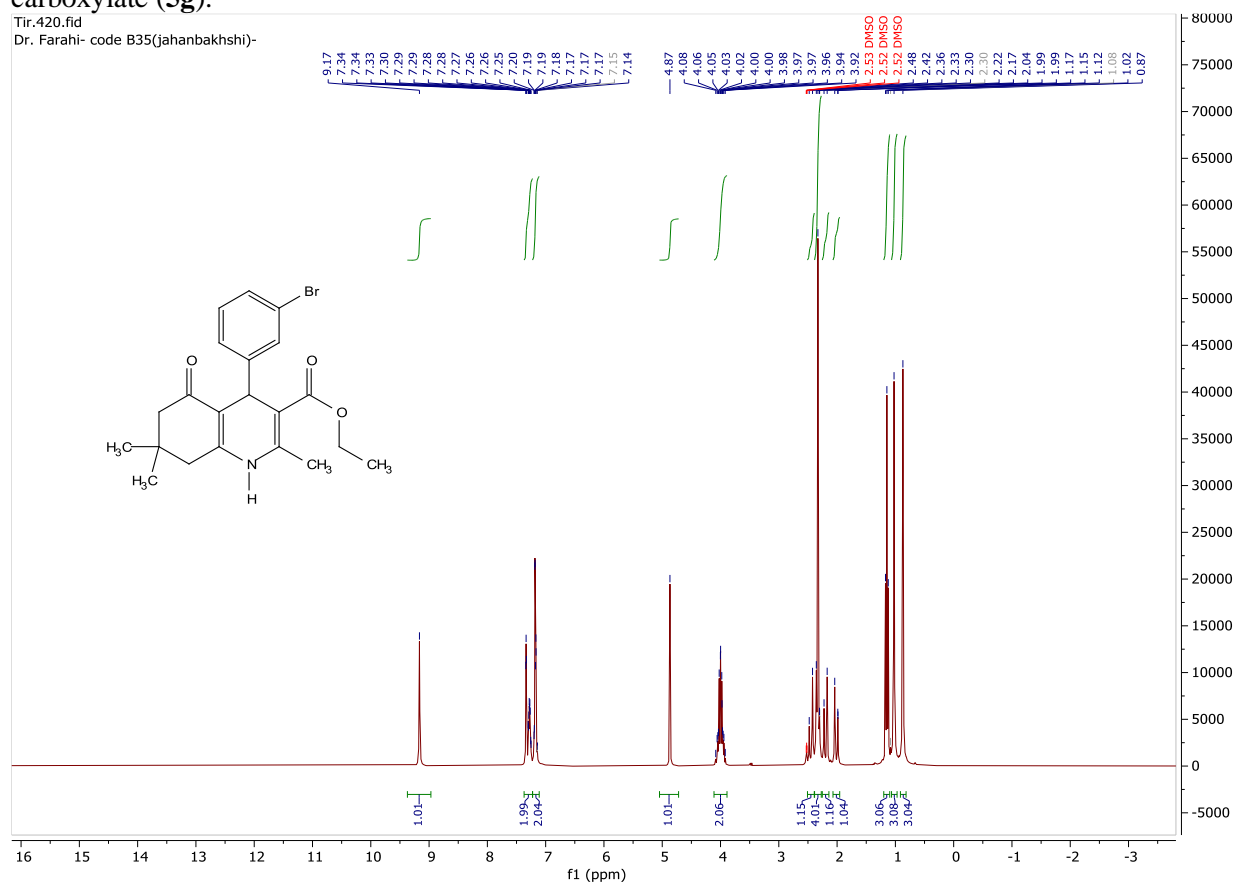

<sup>1</sup>H NMR spectrum of Ethyl-4-(3-bromophenyl)-2,7,7-trimethyl-5-oxo-1,4,5,6,7,8-hexahydro quinoline-3-carboxylate (**5g**).

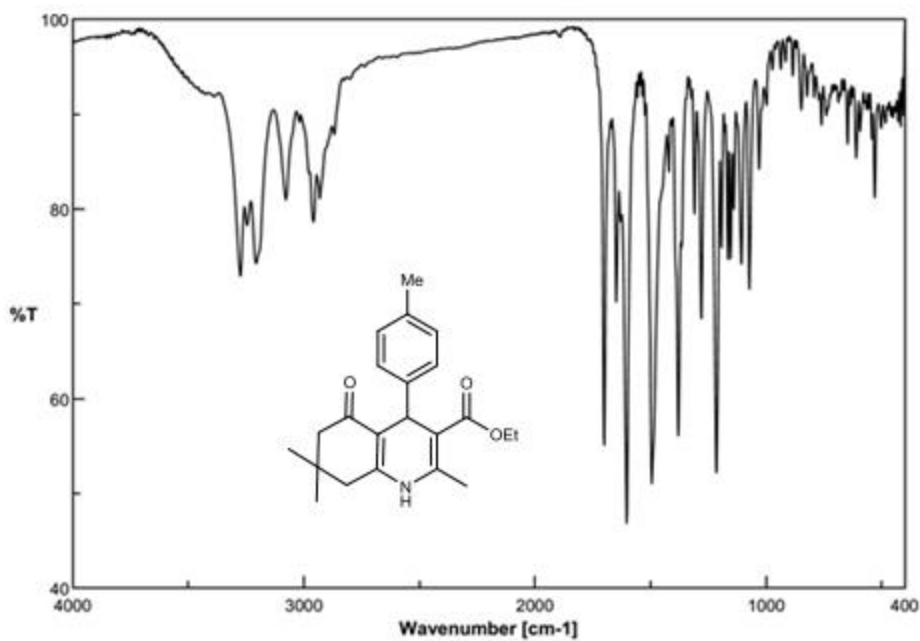



FT-IR spectrum of Ethyl-2,7,7-trimethyl-5-oxo-4-(p-tolyl)-1,4,5,6,7,8-hexahydroquinoline-3-carboxylate (**5h**).

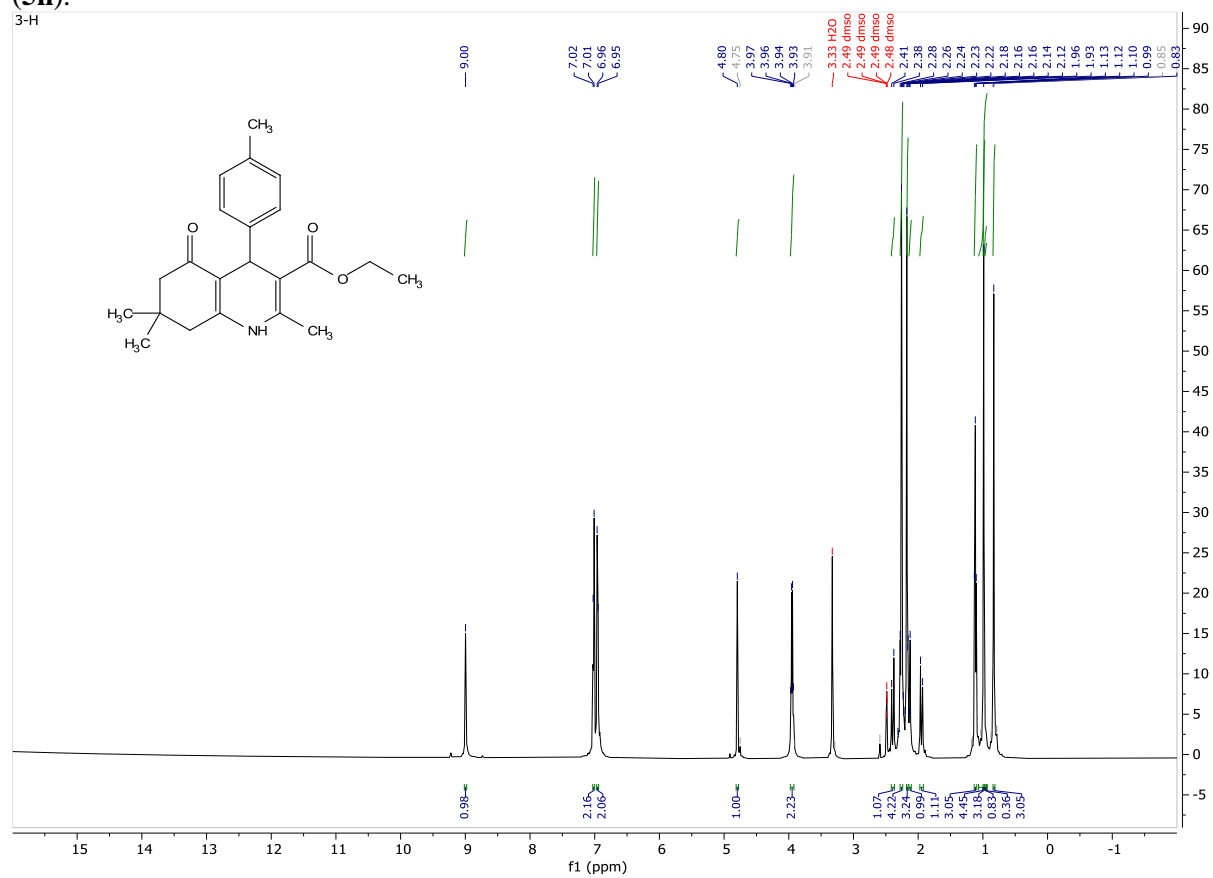

<sup>1</sup>H NMR spectrum of Ethyl-2,7,7-trimethyl-5-oxo-4-(p-tolyl)-1,4,5,6,7,8-hexahydroquinoline-3-carboxylate (**5h**).

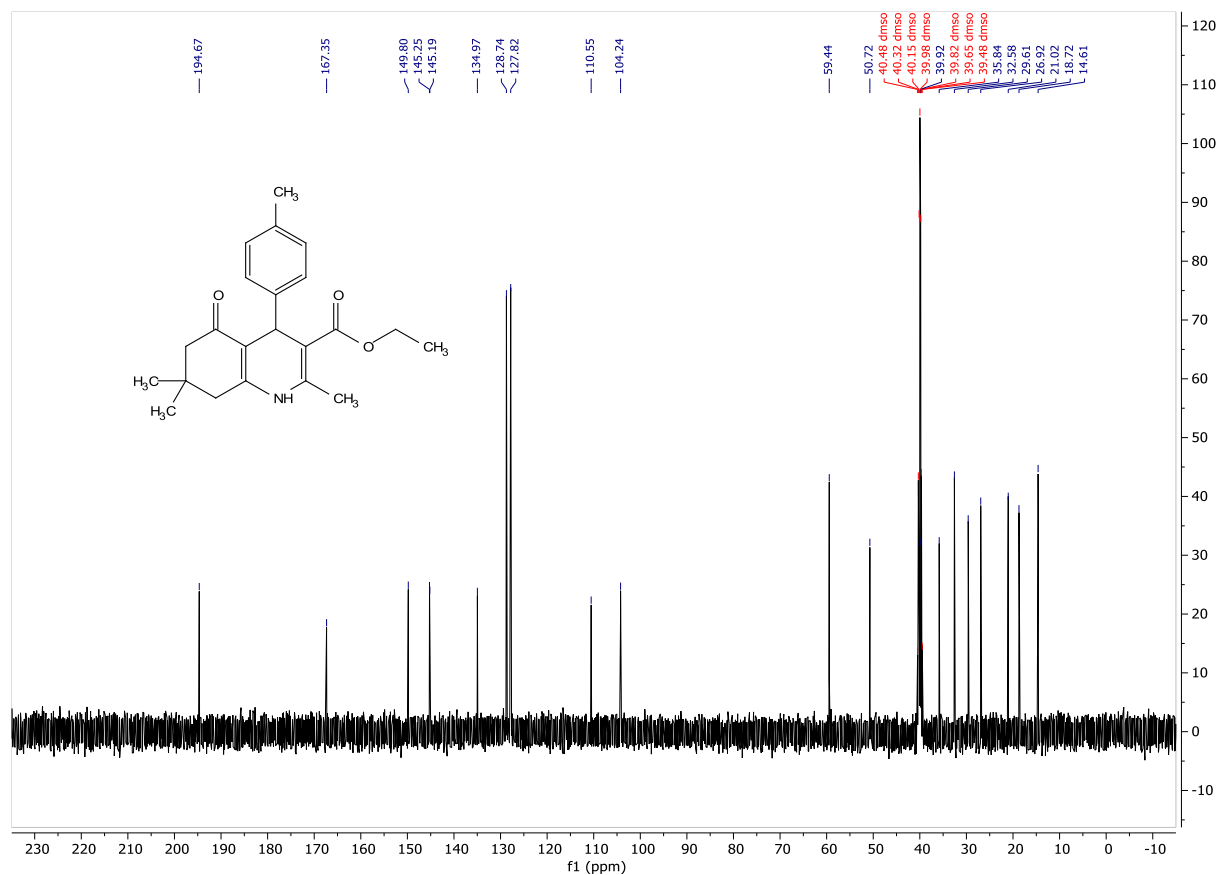

<sup>13</sup>C NMR spectrum of Ethyl-2,7,7-trimethyl-5-oxo-4-(p-tolyl)-1,4,5,6,7,8-hexahydroquinoline-3-carboxylate (**5h**).

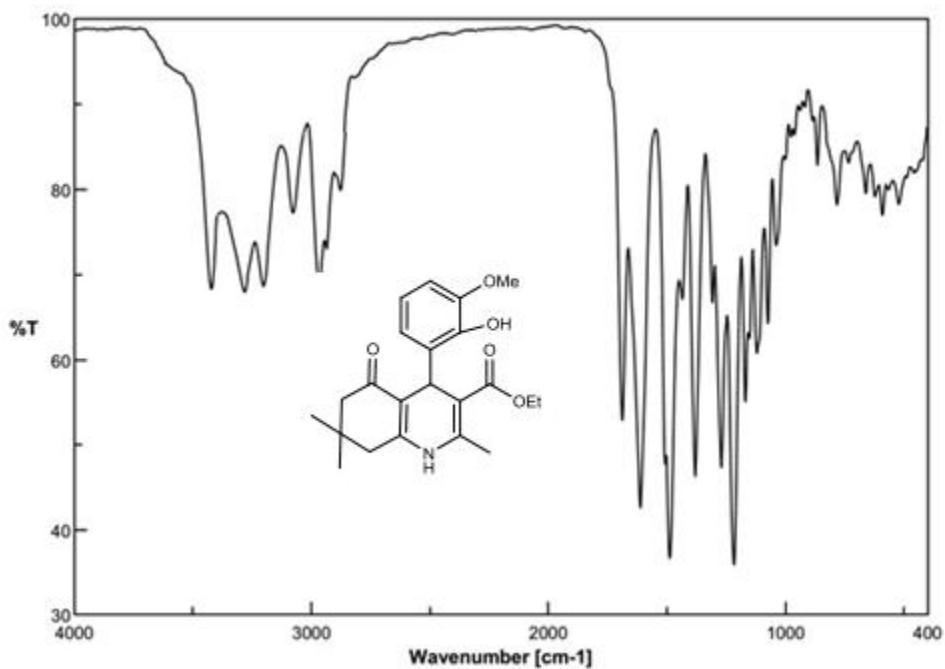

FT-IR spectrum of Ethyl-4-(2-hydroxy-3-methoxyphenyl)-2,7,7-trimethyl-5-oxo-1,4,5,6,7,8-hexahydroquinoline-3-carboxylate (**5i**).

Tir.418.fid  
Dr. Farahi- code M22(jahanbakshi)-

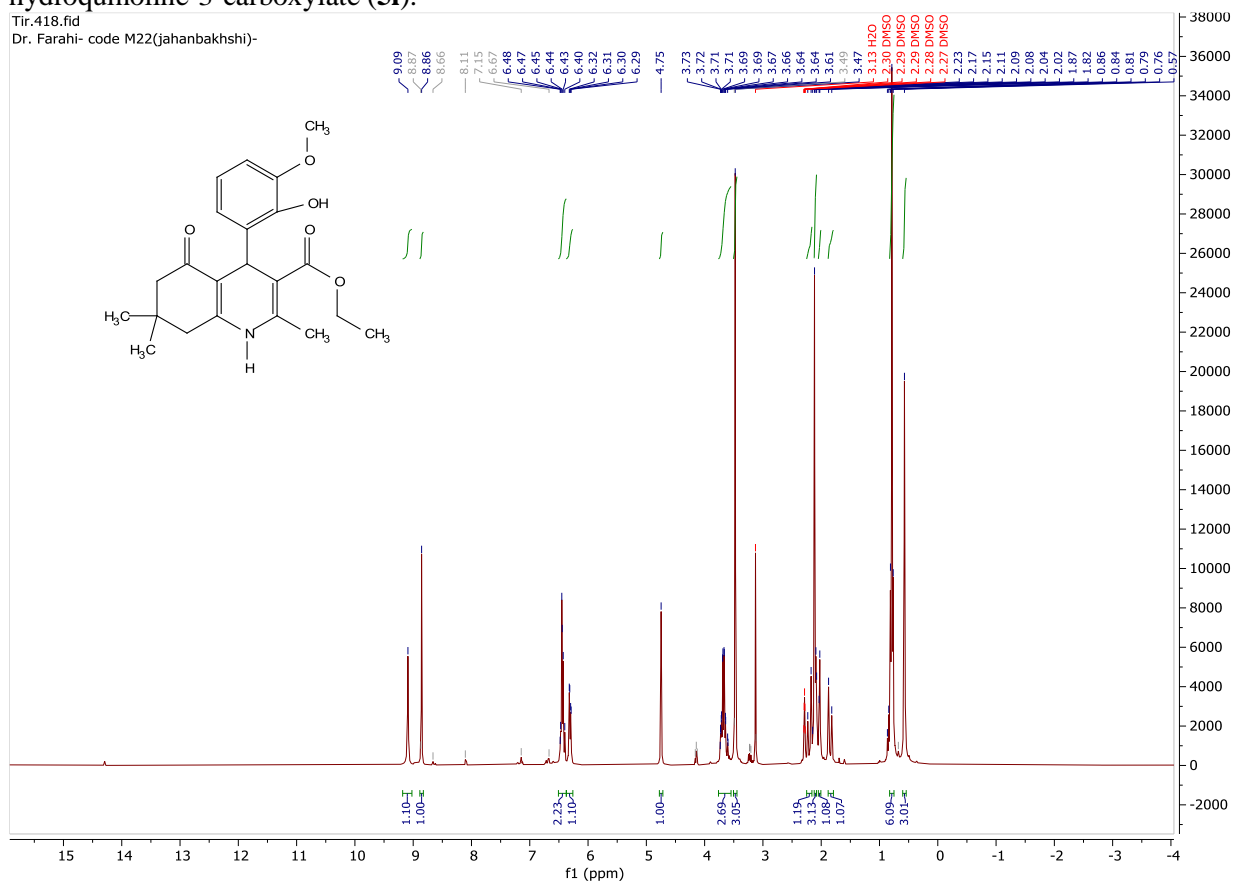

<sup>1</sup>H NMR spectrum of Ethyl-4-(2-hydroxy-3-methoxyphenyl)-2,7,7-trimethyl-5-oxo-1,4,5,6,7,8-hexahydroquinoline-3-carboxylate (**5i**).
